# Supplementary material
Source: PubMed Central journal article supplement (PMC7825643)
Supplement: NIHMS1660706-supplement-supp.pdf [file NIHMS1660706-supplement-supp.pdf]

# THE LANCET

## Supplementary appendix

This appendix formed part of the original submission. We post it as supplied by the authors.

Supplement to: Keyes KM, Westreich D. UK Biobank, big data, and the consequences of non-representativeness. *Lancet* 2019; **393**: 1297.

|                                                                                                                                                | Diseased (Y+) | Diseased (Y-) | Total      | Risk ratio                                                                                                             |
|------------------------------------------------------------------------------------------------------------------------------------------------|---------------|---------------|------------|------------------------------------------------------------------------------------------------------------------------|
| <b>Association between exposure (X) and outcome (Y) in the population</b>                                                                      |               |               |            |                                                                                                                        |
| Exposed (X+)                                                                                                                                   | 16 500 000    | 16 500 000    | 33 000 000 | $\frac{\left[ \frac{16\ 500\ 000}{33\ 000\ 000} \right]}{\left[ \frac{8\ 250\ 000}{33\ 000\ 000} \right]} = 2 \cdot 0$ |
| Unexposed (X-)                                                                                                                                 | 8 250 000     | 24 750 000    | 33 000 000 |                                                                                                                        |
| Total                                                                                                                                          | 24 750 000    | 41 250 000    | 66 000 000 |                                                                                                                        |
| <b>Observed association in the volunteer sample, with a 1% sample from those unexposed to A, and 0.5% sample drawn from those exposed to A</b> |               |               |            |                                                                                                                        |
| Exposed (X+)                                                                                                                                   | 103 125       | 144 375       | 247 500    | $\frac{\left[ \frac{103\ 125}{247\ 500} \right]}{\left[ \frac{61\ 875}{247\ 500} \right]} = 1 \cdot 67$                |
| Unexposed (X-)                                                                                                                                 | 61 875        | 185 625       | 247 500    |                                                                                                                        |
| Total                                                                                                                                          | 165 000       | 330 000       | 495 000    |                                                                                                                        |

**Table:** Association between exposure (X) and outcome (Y) in a hypothetical population of 66 million residents, and a study sample of approximately 500 000, with differential recruitment based on healthiness
